# Supplementary material for: Innovation in Non-Invasive Diagnosis and Disease Monitoring for Meningiomas
Source: MDPI journal article supplement (doi:10.3390/ijms25084195), 2024-04-10
Supplement: s1 [file s1]

**Table S1.** Article search terms.

| <b>PubMed Searches:</b>                                                                                                                                            | <b>Number of Results:</b> | <b>Google Scholar Searches:</b>                                                        | <b>Number of Results:</b> |
|--------------------------------------------------------------------------------------------------------------------------------------------------------------------|---------------------------|----------------------------------------------------------------------------------------|---------------------------|
| ((meningioma) OR (brain tumor)) AND (((liquid biopsy) OR (genetic marker)) OR (biomarker)) AND (((cfDNA) OR (circulating tumor DNA)) OR (cell-free nucleic acids)) | 362                       | "meningioma" AND "liquid biopsy" AND "cfDNA"                                           | 188                       |
| ((meningioma) OR (brain tumor)) AND ((liquid biopsy) OR (biomarker)) AND (extracellular vesicle)                                                                   | 341                       | "meningioma" AND "liquid biopsy" AND "EV"                                              | 169                       |
| (meningioma) AND (((liquid biopsy) OR (genetic markers)) OR (biomarker)) AND ((miRNA) OR (microRNAs))                                                              | 32                        | "meningioma" AND "liquid biopsy" AND "miRNA"                                           | 255                       |
| (meningioma) AND (((seroreactivity) OR (serologic test)) OR (autoantibodies))                                                                                      | 85                        | "meningioma" AND "liquid biopsy" AND ("seroreactivity" OR "autoantibody" OR "antigen") | 328                       |
| ((meningioma) OR (brain tumor)) AND (spectroscopy) AND ((liquid biopsy) OR (serum diagnostic))                                                                     | 124                       | "meningioma" AND "liquid biopsy" AND "spectroscopy"                                    | 156                       |
